# Supplementary material
Source: MDPI journal article supplement (https://www.mdpi.com/2071-1050/8/3/284)
Supplement: s1 [file s1 › sustainability-115451-Supplementary Material A.pdf]

## **Supplementary Material A—Interview Protocols**

### **Interview Questions for Artist Interviews**

- 1- How long have you lived in Calumet?
  - a. If always, why did you stay here?
  - b. If moved in, why did you move here?
  - c. If grew up here then left and came back, why did you come back?
- 2- I don't know much about this community. What can you tell me about Calumet? What kind of place is it?
- 3- What do you like most about Calumet (or this area more broadly)?
- 4- What are some things that you would like to see different about Calumet?
- 5- When good things happen in Calumet, how do they get done? Who or what makes things happen?
  - a. Can you tell me about any other innovative projects that the Calumet community has been engaged in? How did this happen? How has it worked out?
- 6- What kind of future do you see for Calumet?
- 7- You may have heard that some people in the Calumet community (and around the Keweenaw Peninsula more broadly) are interested in exploring the idea of tapping into the minewater under the village for geothermal energy. This energy could be used for heating or cooling. What do you think about this idea? [is it worthwhile to look into it? Why or why not?]
- 8- If the Calumet area were to tap into the minewater for geothermal energy, how would you like to see it get done? What would be important things to consider?
- 9- What do you see as the primary opportunities that minewater geothermal could potentially bring to Calumet?
- 10- What do you see as the major challenges that would make minewater geothermal difficult or problematic?
- 11- Do you believe that Calumet (or maybe the Keweenaw Peninsula more broadly) is capable and ready to be an innovator or leading community for sustainable energy sources? Why or why not?
- 12- Is there anything else that you think I should know?

### **Interview Questions for Residents and Community Leaders**

- 1- How long have you lived in Calumet?
  - a. If always, why did you stay here?
  - b. If moved in, why did you move here?
  - c. If grew up here then left and came back, why did you come back?
- 2- I don't know much about this community. What can you tell me about Calumet? What kind of place is it?
- 3- When good things happen in Calumet, how do they get done? Who or what makes things happen?
  - a. Can you tell me about any other innovative projects that the Calumet community has been engaged in? How did this happen? How has it worked out?
- 4- What kind of future do you see for Calumet?
- 5- Do you believe that the Calumet area is capable and ready to be an innovator or a leading community in sustainability? Why or why not?

**The following questions were posed in some of our interviews. They are specifically about minewater geothermal. When responses happened to refer to sustainability more generally and/or to the arts, the responses are included in the data used for this paper.**

- 5- You may have heard that some people in the Calumet community (and around the Keweenaw Peninsula more broadly) are interested in exploring the idea of tapping into the minewater under the village for geothermal energy. This energy could be used for heating or cooling buildings or greenhouses. What do you think about this idea? [is it worthwhile to look into it? Why or why not?]
- 6- If the Calumet area were to tap into the minewater for geothermal energy, how would you like to see it get done? What would be important things to consider?
- 7- What do you see as the primary opportunities that minewater geothermal could potentially bring to Calumet?
- 8- What do you see as the major challenges that would make minewater geothermal difficult or problematic?
- 10- Is there anything else that you think I should know?
