# Supplementary material
Source: MDPI journal article supplement (https://www.mdpi.com/2071-1050/8/3/284)
Supplement: s1 [file s1 › sustainability-115451-Supplementary Material B.pdf]

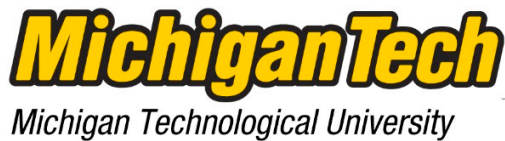

## First Fridays in Calumet Survey

**Thank you** for taking the time to fill out this brief survey in conjunction with a class on Rural Community Sustainability at Michigan Tech University. The purpose of this project is to assess First Fridays in Calumet, analyzing the extent to which the program contributes to community and economic development, how it might be improved, and how its successes might be applied to other programs. The results will be used by Main Street Calumet (local community organization) and community artists and galleries to improve efforts toward making Calumet a more sustainable, vibrant community.

While we ask for your name, it is only so that we can know which galleries people go to. We will not share your name or contact information. You are welcome to use a pseudonym, just please use a consistent one.

Participation is not required, but we invite you to provide the following information. If you have any questions or concerns, please contact: Richelle Winkler, Assistant Professor of Sociology, Michigan Tech University, [rwinkler@mtu.edu](mailto:rwinkler@mtu.edu), (906) 487-1886.

Please join us for a community presentation of the results on Thursday, April 25 at 7:00pm, NPS Visitors Center.

Name\_\_\_\_\_

City/State of Residence\_\_\_\_\_

Age\_\_\_\_\_

**How often do you come to First Fridays?**

- ☐ Almost Always
- ☐ Several times a year
- ☐ Rarely: 1-3 times a year
- ☐ Only a couple of times ever
- ☐ This is the first time I've been

**What do you value about First Fridays?**

**If you would like to share any additional comments, please do so on the back.**
